# Supplementary material for: OsCAMTA3 Negatively Regulates Disease Resistance to Magnaporthe oryzae by Associating with OsCAMTAPL in Rice
Source: Int J Mol Sci. 2024 May 6;25(9):5049. doi: 10.3390/ijms25095049 (PMC11084498; doi:10.3390/ijms25095049)
Supplement: Supplementary file 1 [file ijms-25-05049-s001.zip]

Archive with 5 entries (5 files):
- Supplementary Figures.pdf
- Table S1. Gene IDs and complete protein sequences of the targeted genes.xlsx
- Table S2. RAP-Loci of the eight genes.xlsx
- Table S3. RNA-seq supplemental data.xlsx
- Table S4. Primers used in this study.xlsx
