# Supplementary material for: OsCAMTA3 Negatively Regulates Disease Resistance to Magnaporthe oryzae by Associating with OsCAMTAPL in Rice
Source: Int J Mol Sci. 2024 May 6;25(9):5049. doi: 10.3390/ijms25095049 (PMC11084498; doi:10.3390/ijms25095049)
Supplement: Supplementary file 1 [file ijms-25-05049-s001.zip › Table S1. Gene IDs and complete protein sequences of the targeted genes.xlsx]

## Sheet: Sheet1
Table S1. Gene IDs and complete protein sequences of the targeted genes.
Gene name	Gene ID	Protein sequence
OsCAMTA1	Os03g0191000	MAEGRRYAIAPQLDIEQILKEAQRRWLRPTEICEILKNYRSFRIAPEPPNRPPSGSLFLFDRKVLRYFRKDGHNWRKKRDGKTVKEAHERLKSGSIDVLHCYYAHGEENINFQRRSYWMLEEDYMHIVLVHYLEVKAGKLSSRSTGHDDVLQASHADSPLSQLPSQTTEGESSVSGQASEYDETESDIYSGGARYNSFSRMRQHENGGGSVIDDSIFSSYVPASSVGSYQGLQATAPNTGFYSHGQDNLPVVLNESDLGTAFNGPNSQFDLSLWIEAMKPDKGTHQIPLYQAPVPSEQSPFTGGPGIESFTFDEVYNNGLSIKDVDGDDTDGETPWQIPNASGTFATADSFQQNDKTLEEAINYPLLKTQSSSLSDIIKDSFKKNDSFTRWMSKELAEV…
OsCAMTA2	Os10g0375600	MAAAADARRFAVVPQLDIAQILKEAQQRWLRPAEICEILKNYKSFRIAPEPPNRPQSGSLFLFDRKVLRYFRKDGHNWRKKKDGKTVKEAHERLKSGSIDVLHCYYAHGEENENFQRRTYWMLEEDFMHIVLVHYLETKGGKSRTRGNNDMHQAAVMDSPLSQLPSQTIDGESSLSGQFSEYEEAESDVYSGGTGYHSFTQMQQQQNGIGPVTDASMFSSRVSASSIGNYQGQHAMGHTTNFYSSSQHDSPLVLSDPNLELANNGHESLWNGVMKPDEGTVQMTHLQPPVHPEQGMFTTEGQGVEYLTFDEVYSDGLSLKDIGAAGADVEPFWQLSSATADISATENSVQQNDGSLGAAIGFPFLKTQSSNLSDILKDSFKKSDSFTRWMSKELLDVED…
OsCAMTA3	Os07g0623100	MAEVRKYGLPNQPPDIPQILLEAQNRWLRPTEICHILSNYKKFSIAPEPPNRPASGSLFLFDRKILRYFRKDGHNWRKKKDGKTVKEAHEKLKVGSVDVLHCYYAHGEENENFQRRTYWLLEEGFMNIVLVHYLEVKGKNNFSRVASKVSAVLKKLKRVQDYLMLIVLHAQTLSLVRASVSKEKFGATDNCRASSRYHPFVEMQQPVDGVMMNNMLGVSAPSAGYHGEMQTTTANSDNHFATHYDIAGVFNEAGAGLRGVSKTLHDSVRFAEPYPECSAEFMEPALYSSNATMESNNLDDNSRLETFMSEALYTNNLTQKEADALSAAGIMSSQAENNSYTDGIRYPLLKQSSLDLFKIEPDGLKKFDSFSRWMSSELPEVADLDIKSSSDAFWSSTET…
OsCAMTAPL	Os03g0388500	MFGDVEVPAEVLADGSLRCYAPEHQSGRVPFYVTCSNRIACSEVREFEYRDSDAQYMETSHSQANGINEMHLQIRLEKLLTLGPDDNQLLVCGNEKLELINAINSLMLDEKWSDQGSPSGSKDVVTPRNQSLKKLMKEKLHCWLIYKIYDCEKGPNILGKEGQGIIHLAAALGFDWAIRPILVAGVNVNFRDAHGWTALHWAASCGRERTVGVLIANGAAAGALTDPTSEFPSGRTPADLASTNGHKGIAGFLAESALTSHLSALTLKESKDSNAEEACRLTIPEDLPEMNYGQLAVQDSHAESLKDSLSAVRKSAQAAARIFQAFRVESFHRKKVVEYGDDDCGLSDEHTFSLISLQKVKQGQHDTRLHSAAVRIQNKFRGWKGRKEFMIIRQRIVKL…
OsALDH2B1	Os06g0270900	MAAAAARRGSSLLSRCLLSRPAAAASPAVPSALRRADGTQGLLPGILQRFSTAAVAEEPISPPVQVNYTQLLIDGKFVDSASGKTFPTLDPRTGELIAHVAEGDAEDINRAVHAARKAFDEGPWPKMTAYERSRILLRFADLIEKHNDEIAALETWDNGKPYAQAANIEVPMVARLMRYYAGWADKIHGLVVPADGPHHVQVLHEPIGVAGQIIPWNFPLLMFAWKVGPALACGNTVVLKTAEQTPLSALFASKLLHEAGLPDGVVNVVSGFGPTAGAALASHMDVDKIAFTGSTDTGKVVLELAARSNLKSVTLELGGKSPFIIMDDADVDHAVELAHFALFFNQGQCCCAGSRTFVHERIYDEFVEKAKARALKRVVGDPFKNGVEQGPQIDDEQFN…
