# Supplementary material for: OsCAMTA3 Negatively Regulates Disease Resistance to Magnaporthe oryzae by Associating with OsCAMTAPL in Rice
Source: Int J Mol Sci. 2024 May 6;25(9):5049. doi: 10.3390/ijms25095049 (PMC11084498; doi:10.3390/ijms25095049)
Supplement: Supplementary file 1 [file ijms-25-05049-s001.zip › Table S2. RAP-Loci of the eight genes.xlsx]

## Sheet: Sheet1
Table S2. RAP-Loci of the eight genes.
ZH11_0 h_vs_osamta3-1_0 h_∩ZH11_24 h_vs_osamta3-1_24 h
Os02g0324500
Os04g0249600
Os06g0246200
Os08g0246800
Os07g0456400
Os11g0173550
Os11g0282700
Os06g0270900
