# Supplementary material for: OsCAMTA3 Negatively Regulates Disease Resistance to Magnaporthe oryzae by Associating with OsCAMTAPL in Rice
Source: Int J Mol Sci. 2024 May 6;25(9):5049. doi: 10.3390/ijms25095049 (PMC11084498; doi:10.3390/ijms25095049)
Supplement: Supplementary file 1 [file ijms-25-05049-s001.zip › Table S3. RNA-seq supplemental data.xlsx]

## Sheet: Camta3_0h_vs_Camta3_24h_∩_ZH11_
				S table 3. RNA-seq supplemental data.
			osamta3-1_0h_vs_osamta3-1_24h_∩_ZH11_0h_vs_ZH11_24h
						Os05g0155400
						Os11g0323860
						Os07g0463600
						Os03g0200200
						Os01g0144800
						Os07g0134600
						Os12g0148600
						Os03g0243600
						Os11g0256900
						Os03g0290300
						Os03g0108600
						Os01g0152600
						Os06g0272850
						Os06g0345200
						Os05g0158600
						Os06g0264300
						Os03g0235900
						Os02g0139500
						Os05g0253200
						Os11g0242100
						Os06g0156600
						Os03g0149300
						Os02g0202500
						Os10g0124900
						Os01g0211800
						Os03g0284600
						Os06g0320500
						Os03g0265900
						Os02g0220400
						Os05g0299500
						Os06g0364500
						Os01g0654200
						Os01g0278600
						Os01g0126200
						Os11g0131800
						Os01g0239200
						Os03g0237201
						Os03g0230500
						Os10g0200000
						Os07g0151200
						Os02g0120100
						Os09g0319800
						Os06g0222800
						Os01g0172200
						Os02g0167000
						Os12g0190000
						Os07g0131600
						Os01g0555100
						Os02g0198600
						Os11g0251400
						Os07g0409900
						Os03g0270700
						Os07g0208500
						Os05g0349200
						Os06g0107700
						Os06g0157500
						Os01g0555200
						Os02g0180000
						Os09g0356000
						Os01g0177400
						Os02g0106100
						Os12g0122400
						Os01g0113200
						Os06g0239500
						Os11g0250000
						Os12g0134000
						Os06g0332800
						Os02g0273050
						Os01g0329900
						Os01g0639900
						Os08g0151800
						Os08g0137300
						Os06g0258000
						Os11g0139800
						Os03g0268600
						Os02g0110200
						Os03g0137300
						Os07g0166700
						Os02g0182600
						Os05g0144200
						Os03g0191400
						Os03g0168200
						Os02g0235600
						Os02g0326500
						Os03g0283200
						Os03g0267800
						Os07g0452500
						Os09g0250700
						Os04g0346000
						Os03g0603600
						Os05g0182600
						Os02g0101000
						Os03g0266800
						Os05g0157300
						Os11g0147800
						Os06g0351500
						Os11g0209600
						Os11g0204800
						Os11g0429100
						Os03g0560200
						Os02g0215200
						Os06g0162800
						Os06g0175400
						Os02g0178000
						Os02g0580100
						Os03g0385301
						Os10g0370700
						Os03g0142900
						Os02g0235701
						Os07g0445600
						Os12g0152900
						Os05g0195700
						Os12g0209000
						Os01g0665300
						Os09g0376800
						Os02g0106201
						Os02g0171100
						Os03g0371000
						Os06g0153900
						Os02g0533900
						Os11g0151002
						Os05g0143550
						Os03g0238600
						Os03g0179900
						Os06g0141200
						Os01g0580000
						Os06g0142550
						Os11g0219000
						Os12g0171700
						Os05g0103200
						Os09g0315000
						Os02g0145500
						Os03g0265300
						Os04g0362375
						Os12g0270300
						Os03g0111600
						Os05g0107900
						Os11g0155600
						Os02g0218200
						Os06g0158900
						Os02g0134300
						Os07g0158300
						Os01g0231800
						Os03g0326600
						Os11g0104300
						Os01g0557500
						Os01g0353900
						Os02g0179100
						Os12g0100100
						Os03g0164300
						Os01g0279400
						Os02g0480200
						Os07g0112100
						Os03g0107400
						Os03g0100050
						Os02g0533800
						Os02g0175000
						Os03g0122300
						Os07g0143200
						Os11g0417800
						Os01g0315800
						Os06g0149166
						Os03g0163300
						Os04g0233400
						Os02g0323000
						Os02g0106700
						Os02g0526400
						Os08g0296900
						Os09g0361500
						Os03g0121800
						Os03g0137600
						Os03g0137700
						Os03g0389000
						Os05g0341600
						Os01g0113300
						Os03g0271400
						Os12g0226900
						Os02g0550600
						Os06g0103300
						Os12g0182700
						Os09g0322000
						Os01g0323000
						Os02g0151300
						Os06g0186500
						Os02g0578800
						Os12g0299150
						Os03g0576200
						Os07g0187700
						Os01g0592500
						Os07g0300900
						Os02g0191300
						Os03g0161200
						Os11g0139900
						Os11g0312400
						Os01g0560000
						Os03g0189600
						Os01g0511600
						Os03g0183000
						Os01g0606050
						Os06g0167000
						Os03g0246500
						Os02g0321000
						Os05g0200100
						Os08g0127700
						Os03g0227400
						Os06g0299100
						Os02g0555900
						Os03g0126700
						Os12g0152800
						Os01g0171000
						Os06g0196700
						Os03g0178200
						Os11g0136500
						Os03g0568900
						Os03g0425000
						Os06g0102300
						Os03g0595300
						Os03g0323200
						Os01g0253900
						Os05g0317900
						Os07g0194100
						Os10g0209700
						Os08g0109200
						Os06g0207000
						Os05g0342900
						Os01g0337900
						Os12g0138900
						Os05g0184901
						Os02g0200800
						Os01g0625200
						Os02g0285800
						Os06g0264800
						Os12g0188700
						Os06g0196300
						Os11g0148300
						Os01g0338600
						Os07g0123300
						Os12g0186600
						Os01g0243100
						Os06g0474800
						Os01g0388000
						Os10g0116900
						Os01g0118100
						Os09g0279400
						Os07g0167500
						Os08g0299000
						Os08g0266600
						Os02g0588550
						Os09g0131400
						Os01g0589000
						Os12g0168700
						Os02g0255100
						Os03g0407900
						Os08g0332700
						Os04g0182800
						Os12g0288400
						Os12g0245800
						Os01g0514000
						Os03g0100030
						Os06g0244000
						Os01g0367900
						Os11g0189900
						Os06g0228500
						Os01g0663400
						Os04g0183100
						Os08g0320300
						Os09g0346400
						Os12g0121600
						Os03g0366000
						Os03g0374600
						Os03g0226300
						Os12g0278800
						Os10g0370000
						Os01g0111400
						Os06g0135000
						Os06g0164900
						Os03g0200700
						Os02g0527600
						Os07g0272400
						Os04g0380400
						Os08g0313200
						Os06g0246000
						Os03g0131200
						Os03g0616300
						Os06g0224200
						Os01g0548600
						Os06g0104000
						Os11g0107400
						Os11g0171300
						Os05g0144900
						Os12g0135100
						Os12g0291100
						Os05g0307100
						Os06g0223700
						Os05g0149500
						Os01g0137950
						Os10g0167600
						Os07g0409200
						Os01g0165000
						Os01g0110400
						Os01g0636500
						Os06g0109801
						Os06g0272800
						Os03g0263400
						Os05g0318300
						Os02g0248200
						Os12g0266000
						Os02g0199300
						Os12g0115801
						Os03g0169100
						Os06g0129600
						Os09g0323500
						Os02g0117500
						Os10g0189100
						Os03g0571700
						Os05g0170200
						Os01g0654100
						Os06g0247900
						Os08g0139700
						Os07g0271000
						Os01g0214600
						Os12g0183100
						Os01g0535900
						Os01g0173000
						Os01g0664200
						Os01g0185900
						Os03g0228200
						Os06g0237800
						Os07g0143600
						Os02g0121700
						Os10g0144700
						Os12g0237000
						Os06g0217500
						Os01g0266800
						Os02g0546600
						Os03g0556600
						Os06g0116400
						Os07g0264800
						Os10g0142100
						Os06g0225100
						Os08g0230000
						Os07g0162100
						Os06g0213200
						Os05g0186000
						Os02g0274900
						Os08g0249100
						Os10g0180000
						Os02g0194700
						Os01g0661400
						Os05g0304900
						Os03g0393700
						Os04g0321800
						Os07g0243100
						Os01g0269000
						Os10g0151800
						Os03g0161900
						Os05g0305700
						Os01g0508000
						Os06g0181200
						Os01g0144340
						Os08g0143900
						Os01g0582400
						Os05g0258400
						Os05g0105000
						Os01g0228400
						Os06g0127000
						Os05g0228000
						Os02g0104100
						Os06g0280900
						Os06g0172000
						Os01g0296166
						Os11g0124900
						Os05g0161500
						Os10g0130500
						Os01g0602800
						Os11g0163600
						Os08g0269600
						Os11g0160100
						Os03g0250200
						Os01g0668901
						Os06g0473000
						Os03g0223400
						Os07g0263400
						Os06g0230100
						Os09g0258000
						Os09g0327400
						Os03g0117800
						Os06g0147200
						Os08g0206950
						Os07g0119000
						Os03g0274000
						Os01g0331100
						Os01g0172100
						Os09g0268300
						Os03g0242300
						Os09g0315700
						Os01g0521200
						Os07g0464200
						Os06g0474200
						Os05g0196200
						Os06g0254700
						Os02g0499000
						Os02g0197700
						Os10g0183900
						Os02g0234800
						Os02g0224400
						Os12g0178000
						Os02g0506500
						Os11g0432900
						Os01g0218700
						Os01g0110700
						Os01g0268600
						Os02g0514326
						Os03g0126300
						Os03g0348900
						Os05g0115800
						Os10g0371200
						Os02g0227200
						Os03g0431100
						Os03g0175800
						Os12g0208900
						Os02g0302500
						Os02g0101500
						Os12g0133100
						Os07g0233300
						Os03g0183800
						Os08g0230800
						Os03g0332400
						Os03g0275300
						Os06g0217900
						Os08g0115800
						Os02g0164800
						Os03g0319100
						Os03g0223200
						Os07g0211101
						Os08g0241800
						Os11g0210500
						Os11g0184900
						Os03g0308200
						Os01g0222700
						Os12g0132850
						Os01g0201200
						Os12g0132800
						Os06g0170500
						Os05g0170950
						Os04g0338100
						Os02g0327500
						Os08g0154300
						Os02g0467600
						Os01g0498200
						Os06g0205600
						Os06g0318566
						Os04g0344100
						Os05g0295200
						Os08g0139000
						Os03g0342900
						Os03g0109300
						Os02g0118400
						Os06g0354700
						Os08g0332400
						Os11g0159000
						Os01g0605700
						Os01g0242300
						Os01g0566100
						Os01g0383700
						Os02g0558200
						Os11g0146200
						Os02g0577100
						Os02g0193425
						Os02g0580900
						Os03g0288000
						Os06g0163300
						Os05g0269100
						Os11g0129000
						Os07g0462200
						Os06g0107100
						Os01g0150000
						Os02g0567200
						Os06g0243900
						Os04g0254300
						Os06g0321700
						Os05g0205000
						Os10g0161800
						Os09g0294000
						Os05g0240200
						Os03g0214000
						Os05g0345500
						Os01g0281100
						Os07g0261200
						Os08g0189600
						Os03g0267300
						Os06g0232200
						Os12g0189400
						Os12g0144200
						Os12g0110300
						Os01g0170051
						Os03g0160400
						Os06g0219400
						Os02g0122100
						Os01g0158500
						Os08g0207500
						Os02g0164000
						Os07g0246600
						Os08g0200600
						Os03g0128866
						Os01g0158200
						Os08g0270200
						Os01g0235350
						Os09g0362800
						Os04g0169666
						Os11g0110901
						Os01g0202500
						Os11g0195600
						Os05g0164100
						Os08g0247600
						Os10g0145200
						Os06g0297800
						Os10g0167700
						Os01g0351200
						Os09g0255300
						Os11g0302500
						Os01g0104600
						Os06g0179700
						Os03g0270200
						Os05g0103700
						Os06g0234200
						Os03g0332533
						Os01g0187900
						Os12g0106000
						Os11g0303200
						Os07g0464600
						Os08g0176200
						Os06g0484600
						Os06g0281400
						Os11g0108800
						Os07g0179700
						Os05g0130100
						Os05g0210600
						Os02g0232000
						Os03g0259900
						Os03g0340500
						Os01g0189800
						Os01g0390900
						Os05g0208600
						Os08g0187700
						Os06g0326700
						Os02g0448400
						Os01g0147300
						Os07g0185000
						Os06g0158000
						Os05g0137200
						Os01g0203800
						Os03g0371350
						Os08g0187500
						Os08g0110800
						Os05g0122600
						Os12g0105300
						Os03g0232500
						Os03g0224200
						Os05g0143500
						Os08g0205900
						Os02g0197125
						Os05g0182100
						Os03g0227700
						Os01g0141600
						Os01g0351800
						Os03g0195500
						Os03g0132800
						Os03g0609800
						Os03g0598200
						Os05g0319100
						Os03g0133300
						Os06g0146250
						Os03g0243350
						Os01g0158900
						Os05g0232200
						Os02g0529700
						Os02g0234500
						Os01g0128000
						Os09g0120033
						Os11g0439300
						Os03g0598100
						Os10g0362300
						Os02g0298100
						Os03g0376100
						Os01g0151500
						Os04g0119300
						Os01g0249100
						Os08g0203100
						Os02g0503500
						Os04g0310400
						Os02g0122900
						Os02g0237100
						Os06g0274500
						Os08g0191700
						Os12g0281600
						Os02g0232500
						Os11g0140400
						Os12g0225100
						Os01g0253300
						Os11g0151700
						Os03g0441601
						Os05g0325400
						Os06g0318600
						Os11g0105750
						Os07g0170100
						Os06g0486800
						Os03g0431200
						Os05g0150800
						Os01g0170700
						Os01g0363500
						Os01g0185400
						Os05g0176100
						Os08g0299300
						Os05g0261700
						Os02g0313400
						Os01g0175700
						Os06g0258900
						Os07g0437500
						Os09g0363700
						Os02g0554100
						Os07g0227750
						Os01g0176400
						Os12g0280801
						Os03g0416200
						Os12g0425800
						Os07g0100800
						Os05g0121600
						Os03g0363850
						Os04g0105100
						Os02g0221900
						Os06g0134400
						Os06g0295700
						Os06g0174300
						Os07g0109300
						Os02g0515000
						Os01g0141100
						Os03g0305100
						Os01g0627500
						Os10g0360175
						Os01g0626100
						Os05g0320300
						Os12g0102200
						Os12g0126000
						Os11g0126100
						Os02g0173000
						Os04g0244800
						Os03g0226600
						Os02g0141300
						Os04g0380300
						Os03g0311401
						Os06g0284200
						Os03g0371300
						Os02g0123200
						Os03g0280400
						Os11g0104400
						Os03g0206300
						Os03g0243900
						Os01g0246500
						Os01g0637600
						Os03g0254200
						Os09g0363100
						Os01g0268300
						Os11g0297800
						Os07g0148900
						Os03g0611200
						Os03g0558400
						Os08g0277900
						Os04g0349600
						Os01g0279700
						Os02g0152600
						Os01g0167100
						Os11g0131900
						Os01g0175400
						Os11g0186200
						Os01g0552300
						Os05g0121000
						Os12g0106700
						Os02g0257300
						Os03g0184550
						Os07g0176200
						Os02g0437300
						Os05g0149600
						Os06g0178700
						Os03g0138100
						Os08g0162000
						Os07g0442900
						Os12g0263800
						Os03g0115100
						Os03g0330300
						Os02g0165000
						Os06g0228200
						Os05g0129800
						Os01g0133500
						Os05g0279400
						Os02g0199800
						Os11g0417400
						Os06g0253600
						Os11g0175400
						Os03g0302200
						Os05g0188300
						Os11g0210300
						Os11g0242800
						Os07g0264000
						Os12g0133201
						Os07g0462700
						Os03g0159800
						Os07g0173200
						Os01g0617700
						Os02g0129900
						Os05g0106100
						Os01g0230200
						Os01g0645200
						Os06g0225400
						Os03g0318600
						Os01g0579600
						Os12g0435200
						Os02g0320800
						Os02g0556100
						Os12g0123500
						Os07g0247100
						Os02g0296800
						Os03g0407050
						Os05g0287800
						Os02g0579000
						Os11g0432301
						Os07g0244900
						Os03g0386800
						Os11g0271000
						Os06g0171900
						Os03g0320100
						Os08g0122800
						Os01g0607900
						Os09g0280300
						Os11g0118500
						Os03g0161500
						Os03g0432100
						Os01g0141900
						Os02g0167100
						Os03g0242200
						Os01g0142800
						Os03g0565600
						Os05g0320700
						Os06g0217300
						Os04g0191500
						Os05g0121200
						Os03g0309000
						Os01g0184900
						Os03g0122000
						Os08g0229200
						Os03g0598150
						Os06g0137100
						Os01g0169800
						Os09g0248300
						Os05g0100600
						Os10g0115600
						Os07g0448400
						Os03g0572900
						Os03g0565200
						Os03g0151900
						Os03g0573750
						Os05g0114000
						Os09g0296800
						Os01g0649900
						Os06g0171800
						Os03g0211700
						Os03g0151700
						Os01g0357100
						Os01g0262500
						Os03g0118200
						Os03g0254900
						Os06g0476200
						Os08g0188000
						Os02g0158100
						Os12g0263000
						Os04g0234600
						Os02g0178100
						Os03g0271500
						Os02g0520100
						Os05g0113400
						Os08g0148600
						Os07g0435300
						Os08g0254500
						Os01g0112300
						Os03g0260100
						Os03g0389100
						Os11g0143500
						Os01g0581300
						Os04g0338000
						Os05g0244500
						Os04g0372700
						Os02g0107300
						Os03g0294100
						Os02g0469300
						Os02g0232400
						Os03g0172000
						Os03g0120200
						Os01g0390600
						Os06g0304600
						Os01g0515300
						Os02g0589000
						Os03g0363400
						Os03g0370000
						Os11g0265500
						Os11g0222900
						Os02g0180800
						Os03g0154100
						Os11g0307550
						Os03g0318500
						Os02g0503400
						Os06g0157700
						Os02g0274100
						Os03g0211500
						Os03g0158550
						Os04g0247500
						Os03g0108500
						Os03g0107600
						Os02g0125400
						Os09g0367900
						Os03g0167200
						Os11g0156600
						Os02g0556900
						Os10g0109300
						Os02g0196600
						Os03g0180300
						Os12g0182600
						Os02g0135200
						Os11g0202000
						Os10g0154000
						Os05g0181250
						Os06g0264500
						Os05g0346100
						Os05g0199700
						Os05g0116100
						Os12g0123200
						Os02g0110700
						Os12g0115700
						Os07g0457550
						Os02g0278700
						Os03g0379100
						Os11g0142500
						Os06g0223800
						Os03g0103800
						Os03g0224700
						Os06g0154900
						Os11g0129200
						Os01g0260800
						Os06g0271400
						Os09g0114500
						Os10g0348900
						Os01g0175600
						Os11g0141000
						Os01g0227500
						Os11g0129800
						Os08g0175300
						Os08g0260000
						Os11g0412484
						Os11g0216300
						Os01g0262600
						Os10g0109600
						Os01g0172600
						Os08g0280600
						Os12g0169400
						Os05g0125500
						Os11g0181900
						Os03g0293100
						Os01g0303800
						Os11g0168100
						Os12g0143900
						Os07g0150100
						Os03g0255100
						Os02g0480900
						Os08g0190700
						Os08g0110000
						Os05g0205050
						Os09g0343200
						Os12g0136500
						Os02g0259600
						Os05g0135500
						Os02g0167300
						Os02g0511400
						Os05g0116000
						Os11g0112800
						Os01g0175733
						Os07g0167000
						Os02g0575900
						Os03g0261100
						Os08g0137200
						Os01g0178500
						Os11g0286800
						Os01g0194300
						Os01g0323300
						Os02g0564400
						Os01g0654500
						Os05g0123100
						Os03g0594400
						Os02g0435000
						Os05g0303000
						Os01g0214200
						Os12g0139400
						Os03g0146400
						Os02g0280100
						Os06g0155400
						Os02g0135900
						Os01g0102600
						Os01g0151200
						Os02g0227100
						Os01g0144200
						Os02g0529400
						Os03g0157400
						Os03g0309800
						Os11g0123500
						Os01g0627450
						Os06g0178900
						Os01g0137700
						Os02g0555300
						Os03g0426800
						Os04g0308000
						Os01g0666200
						Os07g0187200
						Os02g0173100
						Os04g0191600
						Os03g0187100
						Os08g0315200
						Os06g0186400
						Os06g0111400
						Os09g0369400
						Os01g0254000
						Os12g0121100
						Os04g0298200
						Os09g0284400
						Os02g0102850
						Os06g0105700
						Os01g0144000
						Os01g0627400
						Os01g0186200
						Os06g0174400
						Os07g0245100
						Os03g0388900
						Os10g0181333
						Os08g0243600
						Os02g0143100
						Os08g0163400
						Os07g0100300
						Os01g0117900
						Os05g0230700
						Os12g0203000
						Os01g0118700
						Os07g0142900
						Os11g0245100
						Os07g0102400
						Os01g0306900
						Os07g0191700
						Os03g0178100
						Os02g0176100
						Os01g0154600
						Os02g0139100
						Os02g0437901
						Os03g0303100
						Os01g0332800
						Os06g0329200
						Os01g0343300
						Os10g0203000
						Os01g0220700
						Os12g0285600
						Os06g0298200
						Os05g0279900
						Os06g0114650
						Os03g0453800
						Os07g0462800
						Os05g0189425
						Os01g0610300
						Os01g0514600
						Os03g0147550
						Os09g0326850
						Os07g0124600
						Os02g0195000
						Os12g0183200
						Os06g0480500
						Os03g0366350
						Os02g0181900
						Os03g0358100
						Os03g0426900
						Os11g0148500
						Os01g0352100
						Os07g0436100
						Os04g0220300
						Os09g0115900
						Os07g0133700
						Os06g0127700
						Os03g0616400
						Os04g0330301
						Os07g0204100
						Os09g0361100
						Os02g0129300
						Os12g0104300
						Os03g0162000
						Os09g0306650
						Os06g0160700
						Os03g0134500
						Os01g0282800
						Os12g0171200
						Os08g0178600
						Os01g0640700
						Os04g0373000
						Os04g0301500
						Os11g0242500
						Os05g0138300
						Os08g0141300
						Os03g0167500
						Os03g0266300
						Os05g0143200
						Os03g0315800
						Os04g0249600
						Os02g0226900
						Os05g0228400
						Os08g0307000
						Os09g0109800
						Os01g0210800
						Os01g0265100
						Os01g0362100
						Os12g0433700
						Os11g0140700
						Os07g0245200
						Os01g0616400
						Os03g0448600
						Os02g0462401
						Os03g0410700
						Os06g0259000
						Os03g0160100
						Os02g0528500
						Os02g0588600
						Os06g0143000
						Os11g0289700
						Os10g0377000
						Os11g0216400
						Os08g0266300
						Os07g0298900
						Os11g0153700
						Os01g0667200
						Os02g0552400
						Os01g0229900
						Os08g0162800
						Os01g0127900
						Os12g0101800
						Os03g0283600
						Os10g0376200
						Os01g0217500
						Os05g0214300
						Os02g0273100
						Os03g0140400
						Os01g0205300
						Os12g0106100
						Os03g0355200
						Os03g0113000
						Os03g0100900
						Os02g0481700
						Os01g0104400
						Os02g0168200
						Os12g0288600
						Os10g0118200
						Os04g0105400
						Os03g0607400
						Os03g0255500
						Os01g0272850
						Os05g0274950
						Os09g0287000
						Os02g0510600
						Os06g0354500
						Os03g0283400
						Os04g0295400
						Os05g0143300
						Os12g0263200
						Os03g0578300
						Os01g0110100
						Os11g0110066
						Os01g0252600
						Os02g0169900
						Os04g0300600
						Os04g0111500
						Os06g0214100
						Os03g0198400
						Os03g0397700
						Os10g0161100
						Os03g0186500
						Os07g0195200
						Os03g0158500
						Os08g0107400
						Os11g0217300
						Os03g0564200
						Os01g0348900
						Os04g0110300
						Os09g0372800
						Os03g0626700
						Os03g0191100
						Os01g0546400
						Os07g0280200
						Os12g0199500
						Os12g0112000
						Os11g0106700
						Os09g0134400
						Os11g0312220
						Os11g0143300
						Os02g0137700
						Os01g0621300
						Os07g0463100
						Os01g0235100
						Os08g0130100
						Os06g0167500
						Os09g0315800
						Os06g0335950
						Os02g0541700
						Os12g0139300
						Os01g0642000
						Os02g0503900
						Os07g0448100
						Os03g0213200
						Os02g0122800
						Os03g0120000
						Os03g0109800
						Os04g0220400
						Os03g0197050
						Os02g0559400
						Os02g0252100
						Os05g0158200
						Os03g0429800
						Os08g0276100
						Os05g0172000
						Os01g0166800
						Os03g0115500
						Os03g0168300
						Os02g0269200
						Os03g0332100
						Os06g0206000
						Os01g0627800
						Os11g0153400
						Os05g0220900
						Os11g0442380
						Os06g0267600
						Os01g0612900
						Os08g0179100
						Os01g0651350
						Os02g0301100
						Os05g0125250
						Os03g0328100
						Os01g0178000
						Os03g0244200
						Os06g0317100
						Os11g0171500
						Os03g0113500
						Os01g0550300
						Os11g0183800
						Os07g0185200
						Os01g0151700
						Os03g0608600
						Os10g0110800
						Os02g0123100
						Os01g0149800
						Os05g0168300
						Os03g0215200
						Os02g0557700
						Os07g0205000
						Os06g0105500
						Os11g0267100
						Os11g0309000
						Os06g0191800
						Os09g0131000
						Os02g0562300
						Os01g0274100
						Os02g0504000
						Os07g0204800
						Os01g0356400
						Os05g0337500
						Os08g0198700
						Os07g0175300
						Os03g0340900
						Os06g0185900
						Os12g0134700
						Os03g0399532
						Os01g0109300
						Os05g0306000
						Os09g0128400
						Os01g0315850
						Os03g0360300
						Os03g0219100
						Os08g0152700
						Os01g0332100
						Os06g0227200
						Os11g0191300
						Os03g0129100
						Os03g0184400
						Os01g0158000
						Os01g0214800
						Os01g0612500
						Os03g0339900
						Os11g0123250
						Os03g0176700
						Os08g0151000
						Os02g0586500
						Os06g0340200
						Os05g0135900
						Os08g0332600
						Os01g0134500
						Os07g0204900
						Os11g0175900
						Os07g0430501
						Os03g0575200
						Os01g0171800
						Os02g0247200
						Os03g0407000
						Os04g0117900
						Os06g0268800
						Os03g0201901
						Os02g0273700
						Os01g0141700
						Os07g0102300
						Os06g0140700
						Os02g0306550
						Os08g0332100
						Os03g0129900
						Os05g0268500
						Os01g0311500
						Os03g0214200
						Os07g0448800
						Os06g0133100
						Os01g0184200
						Os01g0176700
						Os11g0232100
						Os03g0188100
						Os11g0206000
						Os04g0228300
						Os06g0270200
						Os01g0547600
						Os06g0133000
						Os02g0247000
						Os07g0178700
						Os07g0413700
						Os01g0292700
						Os02g0575200
						Os06g0172800
						Os11g0138400
						Os03g0153900
						Os06g0498800
						Os01g0262700
						Os02g0475300
						Os09g0103600
						Os07g0288700
						Os03g0322600
						Os07g0134000
						Os05g0131100
						Os06g0163200
						Os03g0118800
						Os03g0365800
						Os07g0178600
						Os02g0204400
						Os08g0179000
						Os05g0179800
						Os03g0251500
						Os03g0300600
						Os04g0136900
						Os04g0115700
						Os03g0227300
						Os03g0131100
						Os02g0498300
						Os06g0120200
						Os02g0170900
						Os12g0103000
						Os07g0204400
						Os06g0232650
						Os06g0101000
						Os01g0624000
						Os11g0170200
						Os03g0240900
						Os02g0551100
						Os07g0446600
						Os11g0416900
						Os05g0110300
						Os11g0282800
						Os03g0293850
						Os03g0237100
						Os01g0213800
						Os03g0248225
						Os11g0438000
						Os06g0196500
						Os10g0344500
						Os03g0144200
						Os02g0102200
						Os01g0130000
						Os03g0196400
						Os08g0310300
						Os02g0276900
						Os08g0167500
						Os07g0424400
						Os04g0119500
						Os03g0116700
						Os08g0120200
						Os03g0399900
						Os02g0103800
						Os06g0211300
						Os12g0108100
						Os12g0256300
						Os06g0483200
						Os03g0206750
						Os03g0402000
						Os01g0209200
						Os05g0163700
						Os10g0162300
						Os03g0232800
						Os04g0200700
						Os08g0290100
						Os12g0181500
						Os02g0152400
						Os03g0244000
						Os02g0557800
						Os02g0280500
						Os04g0171800
						Os07g0419500
						Os12g0155200
						Os08g0242800
						Os01g0138500
						Os06g0216300
						Os03g0183100
						Os03g0293900
						Os09g0279100
						Os02g0204500
						Os10g0155400
						Os07g0204500
						Os03g0582000
						Os01g0208700
						Os07g0204250
						Os04g0306800
						Os02g0211000
						Os11g0119900
						Os06g0294600
						Os12g0227050
						Os02g0538000
						Os06g0149133
						Os11g0220300
						Os02g0164300
						Os06g0199100
						Os08g0249900
						Os11g0207200
						Os10g0180800
						Os08g0288200
						Os03g0202001
						Os11g0245800
						Os07g0188800
						Os02g0511500
						Os02g0110600
						Os02g0555832
						Os01g0117000
						Os05g0196400
						Os08g0117100
						Os04g0175600
						Os07g0158900
						Os07g0103100
						Os11g0127800
						Os01g0571700
						Os04g0306750
						Os12g0420000
						Os04g0340300
						Os08g0114100
						Os11g0180600
						Os12g0197600
						Os08g0293300
						Os10g0181200
						Os12g0254825
						Os03g0148700
						Os10g0378100
						Os12g0116800
						Os03g0418600
						Os01g0629400
						Os03g0114700
						Os03g0226400
						Os03g0574900
						Os08g0151300
						Os01g0114200
						Os12g0125400
						Os10g0127900
						Os12g0188566
						Os12g0197500
						Os02g0250700
						Os04g0109100
						Os07g0229800
						Os03g0225600
						Os02g0291500
						Os01g0184700
						Os09g0128600
						Os03g0330000
						Os02g0589700
						Os05g0295300
						Os08g0245400
						Os02g0562700
						Os04g0164900
						Os09g0353200
						Os03g0291800
						Os02g0161200
						Os06g0335975
						Os04g0118100
						Os08g0117900
						Os01g0665400
						Os01g0115750
						Os01g0556400
						Os04g0293300
						Os03g0305400
						Os04g0169100
						Os12g0247700
						Os01g0168400
						Os02g0531200
						Os02g0240300
						Os11g0267300
						Os12g0263600
						Os01g0536000
						Os01g0309900
						Os03g0151100
						Os12g0190200
						Os04g0304200
						Os08g0215300
						Os06g0167400
						Os03g0308800
						Os03g0216700
						Os09g0298100
						Os01g0583100
						Os03g0604566
						Os01g0654650
						Os11g0296500
						Os09g0279600
						Os05g0203900
						Os03g0577500
						Os11g0157600
						Os03g0147400
						Os02g0575700
						Os05g0226300
						Os10g0107866
						Os12g0163500
						Os03g0238700
						Os09g0123500
						Os01g0328900
						Os01g0221700
						Os01g0296100
						Os12g0145100
						Os11g0213600
						Os01g0266500
						Os03g0344100
						Os01g0106900
						Os10g0329400
						Os08g0118000
						Os02g0170500
						Os02g0221100
						Os03g0300400
						Os01g0212100
						Os02g0290000
						Os03g0184100
						Os07g0192900
						Os03g0278300
						Os01g0650200
						Os05g0348100
						Os02g0514500
						Os01g0158400
						Os01g0115800
						Os01g0221600
						Os03g0348200
						Os05g0162000
						Os02g0274000
						Os05g0123300
						Os07g0169600
						Os03g0338600
						Os01g0588900
						Os12g0411700
						Os03g0208500
						Os01g0132800
						Os07g0178800
						Os07g0231800
						Os01g0358300
						Os04g0168400
						Os11g0269700
						Os05g0170800
						Os06g0232600
						Os05g0108100
						Os03g0158300
						Os03g0252800
						Os01g0272800
						Os03g0272400
						Os03g0138700
						Os01g0197700
						Os01g0307500
						Os03g0197000
						Os05g0244700
						Os12g0106500
						Os06g0483500
						Os12g0180900
						Os08g0172200
						Os04g0382300
						Os08g0159500
						Os08g0133000
						Os02g0305800
						Os03g0369800
						Os06g0233800
						Os03g0167000
						Os07g0185700
						Os02g0148000
						Os06g0155300
						Os08g0100400
						Os12g0268000
						Os03g0343400
						Os03g0100800
						Os12g0189900
						Os11g0452400
						Os02g0125700
						Os02g0121800
						Os02g0322500
						Os02g0184200
						Os03g0267600
						Os02g0508500
						Os04g0269800
						Os05g0349700
						Os11g0117600
						Os02g0153000
						Os05g0105800
						Os05g0125450
						Os06g0129900
						Os11g0450050
						Os05g0107300
						Os02g0130100
						Os08g0269500
						Os12g0418900
						Os11g0147150
						Os05g0155200
						Os07g0241500
						Os01g0174900
						Os03g0153000
						Os11g0117900
						Os06g0308000
						Os03g0178400
						Os01g0524500
						Os05g0283000
						Os03g0280700
						Os03g0414400
						Os03g0583800
						Os03g0439800
						Os01g0227100
						Os01g0590700
						Os10g0350800
						Os05g0137800
						Os06g0476900
						Os03g0253100
						Os06g0493600
						Os12g0137200
						Os03g0284100
						Os05g0298200
						Os03g0174900
						Os01g0102300
						Os04g0117150
						Os12g0297400
						Os07g0408400
						Os01g0305200
						Os03g0220700
						Os07g0191000
						Os01g0279200
						Os04g0194500
						Os01g0164600
						Os12g0137500
						Os01g0103000
						Os02g0128300
						Os12g0104400
						Os08g0157600
						Os03g0351300
						Os12g0156400
						Os11g0442500
						Os02g0119800
						Os02g0554900
						Os04g0128900
						Os02g0475400
						Os01g0290700
						Os01g0652600
						Os02g0549200
						Os01g0631200
						Os01g0283700
						Os08g0104700
						Os03g0120400
						Os10g0363700
						Os02g0579800
						Os10g0181600
						Os02g0161900
						Os11g0267400
						Os06g0326400
						Os06g0360300
						Os02g0526500
						Os01g0295900
						Os06g0146300
						Os08g0162600
						Os03g0305000
						Os01g0220200
						Os04g0219800
						Os06g0206200
						Os04g0111250
						Os04g0132300
						Os02g0173800
						Os08g0231400
						Os03g0243700
						Os05g0345400
						Os02g0117600
						Os01g0267100
						Os03g0332900
						Os09g0297400
						Os10g0196000
						Os05g0101400
						Os01g0113900
						Os01g0113325
						Os05g0132400
						Os06g0332900
						Os03g0336200
						Os03g0294800
						Os03g0374100
						Os12g0233300
						Os02g0116500
						Os03g0134300
						Os02g0114000
						Os03g0127900
						Os09g0130800
						Os11g0116300
						Os10g0164500
						Os03g0341600
						Os08g0130000
						Os02g0137100
						Os03g0363500
						Os05g0323900
						Os01g0101800
						Os01g0223200
						Os07g0412100
						Os11g0127600
						Os03g0388100
						Os03g0250000
						Os05g0145000
						Os01g0138300
						Os03g0111200
						Os08g0335500
						Os02g0187300
						Os01g0321300
						Os03g0209500
						Os09g0320400
						Os01g0535400
						Os09g0375600
						Os08g0202400
						Os12g0133900
						Os11g0432400
						Os12g0178100
						Os05g0159300
						Os04g0201800
						Os03g0198600
						Os01g0390300
						Os10g0104900
						Os02g0553500
						Os06g0346201
						Os11g0441500
						Os09g0249900
						Os03g0292800
						Os02g0198700
						Os06g0309200
						Os11g0167500
						Os05g0112000
						Os09g0279000
						Os02g0276500
						Os05g0310500
						Os08g0230200
						Os01g0666600
						Os02g0175400
						Os04g0347800
						Os08g0161500
						Os03g0129300
						Os06g0188700
						Os06g0218900
						Os12g0299300
						Os02g0222100
						Os02g0591000
						Os07g0181000
						Os03g0115400
						Os01g0310800
						Os12g0158800
						Os11g0175500
						Os05g0304600
						Os01g0188200
						Os03g0231600
						Os12g0106600
						Os02g0280850
						Os04g0349650
						Os11g0137200
						Os02g0558100
						Os07g0196300
						Os12g0271700
						Os03g0319400
						Os05g0336200
						Os06g0152550
						Os03g0333300
						Os05g0171900
						Os02g0135300
						Os02g0166600
						Os06g0116500
						Os06g0115300
						Os06g0166000
						Os02g0229501
						Os08g0246400
						Os07g0124800
						Os06g0109300
						Os01g0578000
						Os03g0213600
						Os10g0162100
						Os07g0164100
						Os04g0278000
						Os02g0264700
						Os01g0108400
						Os07g0181500
						Os06g0254600
						Os12g0179800
						Os10g0370800
						Os02g0281000
						Os12g0117100
						Os03g0310400
						Os01g0236300
						Os06g0195900
						Os01g0591000
						Os12g0119000
						Os11g0275400
						Os03g0145200
						Os11g0236100
						Os08g0239300
						Os03g0152600
						Os03g0439700
						Os03g0340601
						Os03g0285900
						Os06g0320200
						Os11g0110100
						Os03g0352400
						Os03g0141200
						Os07g0206700
						Os01g0392800
						Os02g0152700
						Os06g0254300
						Os10g0208500
						Os08g0243500
						Os09g0353400
						Os06g0128700
						Os03g0409100
						Os07g0179400
						Os01g0183800
						Os02g0506600
						Os08g0208400
						Os04g0173300
						Os07g0211900
						Os05g0318100
						Os03g0337600
						Os03g0335600
						Os07g0195100
						Os08g0101100
						Os10g0147300
						Os11g0180900
						Os04g0197200
						Os02g0258800
						Os02g0273000
						Os05g0127200
						Os06g0137300
						Os05g0241200
						Os03g0327800
						Os05g0313500
						Os08g0118900
						Os04g0269600
						Os06g0103800
						Os04g0321700
						Os02g0293500
						Os02g0137600
						Os02g0241100
						Os01g0371200
						Os11g0102900
						Os05g0177500
						Os03g0337500
						Os01g0172400
						Os01g0618800
						Os03g0269900
						Os01g0585300
						Os07g0213500
						Os03g0441000
						Os07g0252400
						Os02g0255801
						Os05g0353300
						Os03g0182800
						Os03g0110900
						Os01g0360200
						Os02g0326700
						Os01g0292250
						Os02g0573200
						Os03g0370200
						Os06g0146100
						Os03g0205000
						Os05g0187100
						Os06g0300000
						Os06g0217600
						Os03g0251350
						Os09g0363600
						Os01g0314100
						Os07g0106000
						Os02g0280700
						Os02g0109900
						Os12g0428000
						Os05g0183100
						Os10g0317900
						Os11g0155500
						Os06g0232233
						Os08g0103600
						Os01g0210500
						Os01g0286600
						Os11g0136400
						Os02g0121500
						Os03g0106200
						Os01g0102900
						Os11g0292050
						Os06g0256500
						Os05g0121100
						Os12g0180400
						Os11g0242400
						Os08g0287800
						Os02g0240100
						Os08g0225100
						Os02g0197200
						Os01g0284700
						Os08g0191900
						Os03g0298700
						Os05g0163250
						Os08g0203650
						Os07g0143000
						Os01g0246400
						Os01g0246700
						Os01g0142300
						Os02g0203000
						Os09g0116900
						Os05g0237800
						Os02g0551700
						Os12g0182900
						Os01g0534900
						Os02g0525900
						Os02g0537700
						Os02g0503100
						Os01g0168800
						Os03g0195300
						Os05g0339000
						Os07g0448600
						Os03g0184000
						Os10g0111300
						Os02g0245800
						Os06g0126500
						Os03g0101800
						Os11g0264500
						Os01g0116900
						Os02g0318450
						Os12g0170600
						Os02g0120800
						Os07g0454700
						Os02g0553200
						Os08g0130400
						Os08g0191100
						Os01g0599550
						Os03g0161950
						Os01g0376700
						Os01g0292200
						Os02g0136000
						Os11g0147000
						Os01g0159400
						Os02g0305700
						Os06g0140800
						Os03g0269000
						Os08g0162100
						Os01g0321800
						Os06g0133800
						Os08g0167800
						Os03g0595800
						Os11g0167800
						Os02g0438200
						Os02g0260700
						Os08g0193100
						Os10g0370500
						Os05g0111200
						Os01g0120500
						Os06g0105300
						Os03g0311300
						Os12g0236900
						Os04g0385600
						Os02g0299200
						Os02g0546400
						Os01g0138800
						Os08g0207800
						Os04g0296700
						Os06g0475500
						Os01g0121100
						Os09g0266600
						Os06g0130000
						Os09g0350900
						Os08g0109300
						Os02g0306401
						Os06g0287700
						Os04g0359900
						Os02g0574500
						Os11g0151600
						Os02g0139600
						Os03g0341300
						Os08g0109400
						Os01g0144600
						Os12g0101000
						Os09g0309100
						Os02g0328300
						Os12g0124000
						Os05g0263100
						Os06g0226000
						Os09g0272000
						Os02g0555600
						Os08g0190300
						Os01g0527900
						Os03g0288101
						Os08g0184600
						Os11g0150200
						Os01g0159300
						Os02g0586900
						Os06g0143400
						Os04g0350300
						Os02g0255700
						Os02g0543000
						Os07g0443500
						Os10g0128400
						Os07g0260300
						Os05g0229475
						Os05g0186100
						Os09g0251800
						Os11g0143200
						Os04g0380000
						Os12g0420200
						Os02g0471300
						Os11g0128800
						Os06g0494400
						Os01g0361000
						Os12g0128700
						Os01g0310100
						Os11g0248466
						Os03g0356700
						Os11g0106800
						Os01g0143800
						Os03g0195350
						Os02g0550800
						Os07g0188233
						Os07g0188266
						Os04g0119400
						Os06g0168500
						Os11g0181800
						Os01g0232500
						Os02g0539600
						Os03g0565300
						Os01g0238500
						Os11g0248200
						Os12g0149800
						Os06g0270900
						Os06g0348800
						Os11g0158400
						Os05g0202500
						Os10g0206800
						Os04g0129200
						Os07g0108300
						Os06g0152400
						Os03g0356582
						Os12g0292400
						Os05g0143800
						Os05g0148700
						Os10g0136500
						Os01g0309800
						Os01g0192300
						Os12g0188900
						Os04g0121100
						Os11g0208900
						Os12g0165900
						Os11g0275200
						Os11g0425300
						Os01g0328600
						Os03g0100400
						Os12g0292900
						Os02g0190600
						Os08g0206400
						Os08g0300300
						Os02g0541325
						Os07g0171100
						Os11g0116200
						Os01g0108800
						Os12g0102500
						Os10g0103800
						Os07g0227800
						Os10g0190500
						Os04g0379700
						Os01g0115900
						Os04g0121300
						Os08g0120500
						Os01g0659900
						Os12g0231000
						Os02g0112900
[truncated: 101 more rows]

## Sheet: ZH11_0h_vs_ZH11_24h
						ZH11_0h_vs_ZH11_24h （without the 2099 genes）
						Os05g0126400
						Os06g0142800
						Os02g0584700
						Os05g0123200
						Os11g0209000
						Os02g0314300
						Os07g0421866
						Os08g0112600
						Os06g0151300
						Os09g0119100
						Os04g0154800
						Os05g0120700
						Os05g0128100
						Os05g0156800
						Os12g0124700
						Os03g0374901
						Os02g0453000
						Os02g0110000
						Os06g0199200
						Os10g0365800
						Os11g0106100
						Os02g0567900
						Os02g0102400
						Os08g0135900
						Os12g0166500
						Os06g0320801
						Os03g0161400
						Os01g0238800
						Os11g0185800
						Os11g0448400
						Os07g0196900
						Os03g0312300
						Os01g0106400
						Os12g0291400
						Os02g0301000
						Os02g0272400
						Os01g0167700
						Os10g0113000
						Os02g0266300
						Os02g0190500
						Os01g0584200
						Os10g0189600
						Os09g0124200
						Os08g0272000
						Os07g0418150
						Os01g0558800
						Os03g0367000
						Os06g0498500
						Os01g0213100
						Os01g0151600
						Os06g0138200
						Os04g0379400
						Os01g0229400
						Os03g0337200
						Os08g0140500
						Os08g0171700
						Os12g0145150
						Os12g0146500
						Os01g0194000
						Os12g0137100
						Os08g0202300
						Os11g0161100
						Os01g0155600
						Os02g0534800
						Os04g0381100
						Os01g0283600
						Os12g0119800
						Os11g0177400
						Os01g0552850
						Os06g0154400
						Os07g0101500
						Os01g0179400
						Os01g0112000
						Os06g0314600
						Os04g0381600
						Os02g0494600
						Os01g0516700
						Os11g0237700
						Os09g0356200
						Os12g0209800
						Os06g0359400
						Os02g0517300
						Os01g0598200
						Os03g0360700
						Os03g0298900
						Os06g0320300
						Os07g0461900
						Os08g0136800
						Os10g0213100
						Os06g0257450
						Os02g0567850
						Os02g0289300
						Os02g0115700
						Os01g0275800
						Os07g0148600
						Os01g0128200
						Os03g0602500
						Os02g0524600
						Os07g0120900
						Os08g0254200
						Os06g0125200
						Os02g0471500
						Os01g0195200
						Os03g0308500
						Os05g0151300
						Os05g0231700
						Os06g0188800
						Os03g0178500
						Os09g0125766
						Os06g0497600
						Os03g0620400
						Os03g0386500
						Os01g0348800
						Os05g0142000
						Os12g0420300
						Os11g0180000
						Os03g0116400
						Os03g0399400
						Os03g0279200
						Os03g0288700
						Os11g0243600
						Os12g0170100
						Os01g0110500
						Os08g0175200
						Os03g0347900
						Os02g0108302
						Os02g0134500
						Os01g0663051
						Os02g0220700
						Os07g0206300
						Os08g0143700
						Os01g0361500
						Os04g0122000
						Os01g0613300
						Os02g0114066
						Os03g0233000
						Os05g0282900
						Os10g0155500
						Os01g0138350
						Os03g0116300
						Os09g0313500
						Os01g0228800
						Os01g0247600
						Os06g0103600
						Os01g0662300
						Os04g0310500
						Os11g0433900
						Os02g0518600
						Os06g0496800
						Os02g0310200
						Os06g0160100
						Os06g0236300
						Os08g0256300
						Os08g0250900
						Os04g0201500
						Os01g0197350
						Os02g0234400
						Os08g0191000
						Os02g0120600
						Os03g0102700
						Os12g0129400
						Os06g0242000
						Os11g0184100
						Os03g0124900
						Os11g0134500
						Os04g0376000
						Os06g0284800
						Os02g0590400
						Os04g0282400
						Os03g0622600
						Os07g0130500
						Os01g0227800
						Os01g0304000
						Os04g0175750
						Os06g0473800
						Os03g0130100
						Os02g0568100
						Os02g0188000
						Os01g0622500
						Os01g0507500
						Os02g0161251
						Os01g0549500
						Os05g0150400
						Os05g0344400
						Os05g0202800
						Os01g0260100
						Os04g0367400
						Os02g0168100
						Os09g0252000
						Os12g0169800
						Os08g0237000
						Os03g0212200
						Os07g0417800
						Os08g0276400
						Os01g0504500
						Os01g0176000
						Os01g0200400
						Os11g0101200
						Os03g0378000
						Os03g0342850
						Os11g0303800
						Os03g0224300
						Os02g0132200
						Os01g0365000
						Os07g0249600
						Os01g0372700
						Os02g0230100
						Os02g0138100
						Os12g0197200
						Os07g0152000
						Os05g0218100
						Os02g0182900
						Os03g0311000
						Os06g0224650
						Os04g0330900
						Os05g0214900
						Os02g0193800
						Os03g0125000
						Os02g0106900
						Os03g0219400
						Os11g0234100
						Os05g0210100
						Os09g0279500
						Os02g0176400
						Os01g0102700
						Os01g0314300
						Os01g0653700
						Os01g0229200
						Os06g0233400
						Os03g0227900
						Os06g0264432
						Os06g0275000
						Os06g0469800
						Os11g0124300
						Os02g0103900
						Os01g0190300
						Os03g0315400
						Os03g0137200
						Os02g0320300
						Os11g0128300
						Os10g0139600
						Os02g0541300
						Os08g0203600
						Os07g0100900
						Os02g0574100
						Os02g0204201
						Os01g0609200
						Os03g0131950
						Os11g0260100
						Os03g0333100
						Os05g0269000
						Os03g0213800
						Os04g0314100
						Os06g0332600
						Os02g0324300
						Os06g0256200
						Os12g0420400
						Os05g0312000
						Os04g0228100
						Os01g0119100
						Os09g0112100
						Os03g0364400
						Os01g0177900
						Os11g0249000
						Os08g0126350
						Os01g0105800
						Os09g0340400
						Os11g0153900
						Os03g0423300
						Os10g0364700
						Os07g0106200
						Os03g0118400
						Os06g0242700
						Os02g0116400
						Os12g0406200
						Os05g0319700
						Os01g0266600
						Os05g0338900
						Os02g0328600
						Os08g0158900
						Os03g0231800
						Os02g0224800
						Os01g0100700
						Os03g0157500
						Os03g0408300
						Os07g0195350
						Os09g0241700
						Os06g0316100
						Os06g0185700
						Os09g0346600
						Os05g0178600
						Os05g0247400
						Os03g0347400
						Os10g0377800
						Os11g0148600
						Os02g0496100
						Os03g0159600
						Os02g0118200
						Os04g0110400
						Os07g0209401
						Os06g0103200
						Os02g0141100
						Os02g0221500
						Os11g0153800
						Os02g0181300
						Os12g0123300
						Os08g0338700
						Os01g0655500
						Os01g0621900
						Os03g0273200
						Os06g0186600
						Os02g0219900
						Os08g0191600
						Os03g0101200
						Os05g0334750
						Os05g0104650
						Os02g0560450
						Os05g0295900
						Os01g0610800
						Os06g0133600
						Os01g0202700
						Os10g0363100
						Os11g0444700
						Os08g0152500
						Os02g0556400
						Os10g0136400
						Os02g0135250
						Os07g0236200
						Os11g0149100
						Os10g0132700
						Os02g0205400
						Os10g0141900
						Os03g0140900
						Os01g0643300
						Os07g0167700
						Os02g0490500
						Os02g0568200
						Os01g0668600
						Os03g0188900
						Os02g0478700
						Os03g0604700
						Os01g0218100
						Os02g0206700
						Os12g0114900
						Os05g0137300
						Os11g0255300
						Os01g0184000
						Os03g0130700
						Os01g0609900
						Os08g0192400
						Os10g0343900
						Os01g0541900
						Os12g0142600
						Os03g0366700
						Os07g0121200
						Os06g0210000
						Os06g0255200
						Os03g0149200
						Os03g0294700
						Os01g0588500
						Os08g0179400
						Os11g0329399
						Os11g0151400
						Os10g0360100
						Os02g0510000
						Os01g0566900
						Os03g0258200
						Os11g0302700
						Os03g0321900
						Os01g0198000
						Os12g0210800
						Os02g0241300
						Os08g0236800
						Os02g0556600
						Os03g0169700
						Os03g0238800
						Os08g0116700
						Os01g0388500
						Os03g0342100
						Os05g0231600
						Os02g0123600
						Os06g0164800
						Os01g0361800
						Os03g0596900
						Os02g0298900
						Os06g0142200
						Os03g0287100
						Os05g0269500
						Os05g0169400
						Os03g0325400
						Os08g0151400
						Os06g0130800
						Os03g0606100
						Os06g0161300
						Os01g0503400
						Os06g0316300
						Os09g0132200
						Os02g0246900
						Os05g0118900
						Os05g0143400
						Os11g0229500
						Os12g0428600
						Os03g0300000
						Os05g0145400
						Os05g0271900
						Os02g0117700
						Os04g0175400
						Os09g0262000
						Os01g0177100
						Os03g0191000
						Os07g0432800
						Os01g0328300
						Os06g0306600
						Os02g0570300
						Os02g0555000
						Os03g0138900
						Os07g0115500
						Os06g0192500
						Os05g0163400
						Os03g0290900
						Os01g0122000
						Os03g0411500
						Os07g0181100
						Os08g0280200
						Os03g0622500
						Os01g0654150
						Os10g0214400
						Os01g0166500
						Os07g0442000
						Os01g0370000
						Os05g0215000
						Os07g0268800
						Os06g0474900
						Os06g0193000
						Os07g0242000
						Os03g0162200
						Os02g0522700
						Os01g0340801
						Os05g0297900
						Os04g0175900
						Os01g0357500
						Os07g0273600
						Os03g0102600
						Os01g0165800
						Os07g0125500
						Os12g0150200
						Os08g0239000
						Os02g0545000
						Os06g0237900
						Os08g0103900
						Os01g0227200
						Os06g0318700
						Os01g0191700
						Os05g0147400
						Os08g0201500
						Os02g0589600
						Os07g0176400
						Os11g0125900
						Os02g0126400
						Os10g0162400
						Os08g0110700
						Os01g0649200
						Os01g0619000
						Os03g0262400
						Os01g0205600
						Os07g0110100
						Os03g0161000
						Os05g0247800
						Os03g0125300
						Os02g0436400
						Os08g0230900
						Os07g0122200
						Os07g0203950
						Os02g0229000
						Os07g0119100
						Os06g0191200
						Os02g0110400
						Os07g0126301
						Os02g0285300
						Os02g0126500
						Os06g0244100
						Os03g0297400
						Os01g0136502
						Os06g0208200
						Os02g0214900
						Os06g0278000
						Os11g0112100
						Os01g0618500
						Os03g0227800
						Os03g0122600
						Os08g0282200
						Os06g0320850
						Os08g0338600
						Os05g0162200
						Os05g0137400
						Os02g0244600
						Os05g0280500
						Os06g0142900
						Os08g0135300
						Os12g0232300
						Os03g0112700
						Os04g0312100
						Os05g0243100
						Os08g0173300
						Os08g0224500
						Os06g0240050
						Os01g0533000
						Os06g0168700
						Os03g0179000
						Os02g0470600
						Os03g0324600
						Os03g0410100
						Os11g0225000
						Os01g0625300
						Os06g0214300
						Os01g0124401
						Os02g0161000
						Os04g0269700
						Os09g0298200
						Os03g0318550
						Os04g0226400
						Os02g0325600
						Os11g0134700
						Os01g0246100
						Os03g0273800
						Os02g0525600
						Os12g0429200
						Os12g0199800
						Os09g0135700
						Os03g0179750
						Os06g0174700
						Os01g0317800
						Os07g0287100
						Os08g0335200
						Os11g0305300
						Os03g0351400
						Os09g0264400
						Os02g0131100
						Os03g0219700
						Os07g0205200
						Os02g0123500
						Os04g0208450
						Os02g0572900
						Os02g0542500
						Os03g0395900
						Os07g0252300
						Os01g0209400
						Os05g0346200
						Os10g0105400
						Os08g0174300
						Os07g0165700
						Os05g0147700
						Os03g0183500
						Os03g0131300
						Os08g0337300
						Os02g0102950
						Os07g0147550
						Os05g0343400
						Os11g0247000
						Os06g0190500
						Os06g0126050
						Os11g0444000
						Os09g0375900
						Os02g0177700
						Os04g0186400
						Os06g0318800
						Os03g0332201
						Os07g0199350
						Os06g0267900
						Os07g0130400
						Os05g0182150
						Os03g0383600
						Os03g0289200
						Os05g0137600
						Os09g0123300
						Os06g0317600
						Os09g0116600
						Os07g0170800
						Os03g0581800
						Os02g0294100
						Os10g0370400
						Os02g0197600
						Os05g0127500
						Os11g0270500
						Os12g0166000
						Os09g0280750
						Os03g0201200
						Os01g0145200
						Os08g0187800
						Os05g0104700
						Os03g0219900
						Os03g0248600
						Os05g0326675
						Os01g0607400
						Os04g0136700
						Os06g0492750
						Os02g0551400
						Os01g0521500
						Os01g0384800
						Os02g0146600
						Os05g0170000
						Os10g0133600
						Os01g0299300
						Os10g0368100
						Os01g0206600
						Os01g0606400
						Os12g0143400
						Os05g0178300
						Os09g0268401
						Os01g0623200
						Os03g0189300
						Os08g0105800
						Os06g0271900
						Os01g0239100
						Os03g0194300
						Os03g0283800
						Os07g0208900
						Os09g0367700
						Os11g0113200
						Os02g0282100
						Os03g0346700
						Os10g0208600
						Os12g0256400
						Os01g0174000
						Os09g0339000
						Os01g0201900
						Os08g0191150
						Os08g0160600
						Os06g0106800
						Os03g0132900
						Os01g0168200
						Os07g0224000
						Os01g0525800
						Os03g0592500
						Os12g0279600
						Os07g0209100
						Os07g0213400
						Os08g0269700
						Os04g0163700
						Os11g0153500
						Os06g0168800
						Os12g0209700
						Os02g0178800
						Os01g0133100
						Os06g0308100
						Os03g0370900
						Os02g0316900
						Os06g0190700
						Os05g0186300
						Os02g0589500
						Os08g0154000
						Os10g0344000
						Os06g0210200
						Os01g0231700
						Os08g0116900
						Os02g0217600
						Os02g0474000
						Os06g0335500
						Os07g0152200
						Os02g0557500
						Os03g0122200
						Os05g0182000
						Os02g0589400
						Os05g0106700
						Os07g0123800
						Os02g0489400
						Os03g0582200
						Os12g0143950
						Os11g0207000
						Os01g0505700
						Os08g0150600
						Os06g0184800
						Os10g0190000
						Os01g0650700
						Os07g0295800
						Os12g0129700
						Os11g0275000
						Os06g0216200
						Os02g0541150
						Os07g0104500
						Os01g0292900
						Os04g0342100
						Os10g0111700
						Os07g0246300
						Os03g0300300
						Os01g0357150
						Os03g0126850
						Os09g0314333
						Os02g0126000
						Os03g0571900
						Os01g0580800
						Os01g0668000
						Os03g0130750
						Os10g0101100
						Os12g0230100
						Os01g0142200
						Os07g0438700
						Os02g0521300
						Os05g0274200
						Os11g0150100
						Os03g0267100
						Os06g0102700
						Os02g0247800
						Os05g0239100
						Os05g0295700
						Os07g0131725
						Os12g0263100
						Os07g0244300
						Os03g0395300
						Os08g0233600
						Os09g0242600
						Os07g0438600
						Os05g0107600
						Os06g0492900
						Os03g0432666
						Os03g0348800
						Os12g0270900
						Os03g0121200
						Os03g0125100
						Os02g0153400
						Os06g0125600
						Os02g0227400
						Os09g0135100
						Os04g0106300
						Os08g0124500
						Os12g0105200
						Os01g0319000
						Os08g0109900
						Os01g0393400
						Os07g0289400
						Os09g0132900
						Os07g0205500
						Os03g0131800
						Os05g0224800
						Os01g0100900
						Os09g0327300
						Os08g0111300
						Os01g0279100
						Os01g0217000
						Os03g0304400
						Os02g0153100
						Os07g0463400
						Os03g0288300
						Os08g0191433
						Os02g0228900
						Os01g0668400
						Os03g0563300
						Os08g0328300
						Os08g0326000
						Os06g0127500
						Os01g0183600
						Os03g0268300
						Os01g0192900
						Os02g0207400
						Os05g0135700
						Os03g0413000
						Os07g0274700
						Os05g0182201
						Os01g0364400
						Os03g0281600
						Os05g0100500
						Os06g0182500
						Os02g0150700
						Os12g0226766
						Os06g0247000
						Os06g0143700
						Os01g0166100
						Os02g0274700
						Os05g0317300
						Os03g0313000
						Os03g0118500
						Os12g0112200
						Os02g0327000
						Os04g0110350
						Os12g0141500
						Os10g0191300
						Os05g0119350
						Os03g0165400
						Os02g0201500
						Os01g0254100
						Os07g0281700
						Os05g0121900
						Os03g0278400
						Os03g0103700
						Os05g0103500
						Os02g0313500
						Os05g0169900
						Os05g0207900
						Os10g0107600
						Os05g0217800
						Os08g0297500
						Os12g0132400
						Os05g0163300
						Os10g0135600
						Os11g0113700
						Os01g0222800
						Os11g0147901
						Os01g0291500
						Os01g0616100
						Os04g0280200
						Os11g0264300
						Os02g0117800
						Os03g0133800
						Os06g0164500
						Os11g0149300
						Os03g0255400
						Os06g0274200
						Os01g0259900
						Os03g0242900
						Os10g0100500
						Os05g0165900
						Os02g0148400
						Os12g0151900
						Os04g0219700
						Os08g0333100
						Os06g0338200
						Os01g0289950
						Os03g0200500
						Os05g0208500
						Os02g0534400
						Os11g0130200
						Os01g0575801
						Os02g0208600
						Os01g0178400
						Os10g0185200
						Os02g0513100
						Os01g0180400
						Os01g0651800
						Os03g0322900
						Os09g0246300
						Os12g0277500
						Os09g0332700
						Os08g0272200
						Os05g0199100
						Os09g0242800
						Os01g0602400
						Os02g0117550
						Os03g0209800
						Os10g0202900
						Os02g0555200
						Os10g0118000
						Os01g0318202
						Os09g0272900
						Os01g0140700
						Os03g0249500
						Os07g0191401
						Os11g0229300
						Os10g0368400
						Os07g0160500
						Os07g0108200
						Os03g0334100
						Os08g0155400
						Os03g0326500
						Os02g0226300
						Os02g0177800
						Os03g0203100
						Os02g0517900
						Os08g0101000
						Os12g0112500
						Os12g0115300
						Os03g0215900
						Os07g0227400
						Os01g0281200
						Os08g0213400
						Os03g0130900
						Os01g0572300
						Os05g0192100
						Os03g0247900
						Os04g0191400
						Os03g0626500
						Os02g0275100
						Os02g0193200
						Os09g0110300
						Os09g0363500
						Os01g0658500
						Os04g0310800
						Os03g0421800
						Os12g0165700
						Os05g0337400
						Os08g0120000
						Os08g0240200
						Os05g0235300
						Os05g0149800
						Os01g0235325
						Os01g0506100
						Os06g0285900
						Os03g0355800
						Os01g0101150
						Os03g0124000
						Os08g0199400
						Os12g0256000
						Os03g0576600
						Os10g0140300
						Os11g0126900
						Os09g0255900
						Os07g0281351
						Os03g0114800
						Os11g0202400
						Os10g0154700
						Os01g0594800
						Os01g0574400
						Os02g0494400
						Os03g0586500
						Os02g0204700
						Os06g0125400

## Sheet: Camta3_0h_vs_Camta3_24h
							osamta3-1_0h_vs_osamta3-1_24h（without the 2099 genes）
								Os03g0101600
								Os03g0325500
								Os03g0596800
								Os08g0189200
								Os11g0161700
								Os02g0213450
								Os08g0323400
								Os12g0120400
								Os02g0287700
								Os12g0108600
								Os01g0669100
								Os12g0176500
								Os07g0416600
								Os03g0162900
								Os10g0109700
								Os03g0312600
								Os10g0362700
								Os01g0242900
								Os01g0127600
								Os06g0134200
								Os11g0116900
								Os03g0221100
								Os01g0224166
								Os06g0494000
								Os11g0160400
								Os02g0518400
								Os02g0245200
								Os04g0259200
								Os06g0204600
								Os12g0136900
								Os01g0124550
								Os02g0548700
								Os03g0269100
								Os08g0154900
								Os11g0285000
								Os11g0123066
								Os02g0162600
								Os05g0135400
								Os06g0164600
								Os03g0621700
								Os09g0256700
								Os01g0266000
								Os12g0106550
								Os03g0167550
								Os03g0289300
								Os03g0345100
								Os01g0102850
								Os04g0243700
								Os03g0240400
								Os02g0312600
								Os11g0182500
								Os06g0147100
								Os06g0193300
								Os05g0154600
								Os10g0159600
								Os09g0316000
								Os02g0206400
								Os12g0170800
								Os12g0125500
								Os03g0406200
								Os01g0281000
								Os02g0158300
								Os07g0115300
								Os03g0210900
								Os02g0484200
								Os04g0319600
								Os07g0196100
								Os08g0119900
								Os07g0165200
								Os10g0141600
								Os02g0168600
								Os06g0182300
								Os03g0286900
								Os01g0225400
								Os01g0620100
								Os04g0224600
								Os03g0243800
								Os02g0224100
								Os04g0339400
								Os07g0141400
								Os01g0248600
								Os12g0261300
								Os03g0602600
								Os01g0106700
								Os05g0160600
								Os10g0118900
								Os06g0349800
								Os02g0318100
								Os04g0119800
								Os03g0241200
								Os11g0276000
								Os01g0228600
								Os10g0158700
								Os12g0234800
								Os02g0585200
								Os04g0108300
								Os01g0589200
								Os01g0389200
								Os06g0224500
								Os02g0519950
								Os03g0265100
								Os08g0293100
								Os01g0500750
								Os01g0200350
								Os03g0163100
								Os01g0643800
								Os03g0445700
								Os02g0571300
								Os12g0156866
								Os07g0152900
								Os01g0249200
								Os01g0346400
								Os02g0255000
								Os01g0115600
								Os06g0192950
								Os12g0285650
								Os01g0114800
								Os11g0118300
								Os07g0238700
								Os04g0282200
								Os02g0127700
								Os11g0236200
								Os07g0440900
								Os06g0204100
								Os10g0343100
								Os06g0138600
								Os06g0343100
								Os06g0139200
								Os11g0216000
								Os06g0230000
								Os02g0590200
								Os07g0191500
								Os03g0117100
								Os01g0495900
								Os10g0324600
								Os03g0244700
								Os01g0127700
								Os10g0204100
								Os03g0439500
								Os12g0274700
								Os01g0144700
								Os01g0635200
								Os01g0138400
								Os10g0135250
								Os12g0144000
								Os01g0132500
								Os01g0140400
								Os01g0131600
								Os10g0161625
								Os06g0220800
								Os04g0116200
								Os03g0279700
								Os03g0262000
								Os03g0252100
								Os11g0246900
								Os07g0207100
								Os11g0186800
								Os03g0407100
								Os07g0190000
								Os04g0275950
								Os11g0264200
								Os06g0176801
								Os01g0305900
								Os02g0581000
								Os02g0161100
								Os01g0196300
								Os01g0201100
								Os02g0166950
								Os08g0155000
								Os11g0197400
								Os10g0162834
								Os07g0113200
								Os07g0142802
								Os03g0150600
								Os01g0574500
								Os10g0140200
								Os08g0215200
								Os09g0309600
								Os03g0223900
								Os12g0407300
								Os05g0321900
								Os02g0462000
								Os03g0219450
								Os03g0310900
								Os02g0504500
								Os01g0134900
								Os01g0229600
								Os08g0180400
								Os07g0100500
								Os03g0117300
								Os06g0107600
								Os08g0114300
								Os12g0129000
								Os01g0616900
								Os02g0131800
								Os06g0230301
								Os08g0203800
								Os11g0123033
								Os02g0104200
								Os03g0288400
								Os07g0119600
								Os01g0160800
								Os10g0116400
								Os07g0147500
								Os08g0326500
								Os08g0246950
								Os01g0293200
								Os12g0167700
								Os05g0280200
								Os07g0191200
								Os05g0332801
								Os01g0504100
								Os03g0131400
								Os05g0155000
								Os01g0591500
								Os03g0125400
								Os03g0399600
								Os04g0165000
								Os11g0122150
								Os02g0567100
								Os02g0530500
								Os12g0110400
								Os04g0219600
								Os03g0321700
								Os03g0336000
								Os01g0364100
								Os03g0231700
								Os04g0303900
								Os03g0375300
								Os02g0197400
								Os02g0186500
								Os08g0144000
								Os06g0202800
								Os08g0138500
								Os06g0267200
								Os03g0104100
								Os01g0636100
								Os09g0115500
								Os05g0115100
								Os03g0568500
								Os11g0242200
								Os08g0290000
								Os09g0133800
								Os09g0344800
								Os05g0237200
								Os08g0167000
								Os06g0274600
								Os01g0605100
								Os02g0537950
								Os08g0104300
								Os02g0522300
								Os01g0658700
								Os08g0143400
								Os06g0254901
								Os06g0477400
								Os08g0156600
								Os02g0512200
								Os12g0224500
								Os02g0518100
								Os02g0185400
								Os11g0117400
								Os01g0223500
								Os08g0139100
								Os02g0225000
								Os05g0145100
								Os06g0129100
								Os09g0322100
								Os03g0128932
								Os02g0326200
								Os06g0470800
								Os02g0590800
								Os03g0187800
								Os02g0523500
								Os03g0594900
								Os11g0223000
								Os06g0128500
								Os06g0495100
								Os03g0291700
								Os03g0277650
								Os01g0384300
								Os12g0215950
								Os06g0205100
								Os01g0559600
								Os12g0114000
								Os01g0206800
								Os06g0113950
								Os07g0155600
								Os07g0418000
								Os05g0130400
								Os01g0179000
								Os03g0607700
								Os05g0232700
								Os02g0249700
								Os06g0161900
								Os09g0344500
								Os09g0368200
								Os03g0438100
								Os02g0187800
								Os10g0103700
								Os01g0184800
								Os03g0101700
								Os02g0503700
								Os03g0607500
								Os01g0231500
								Os05g0279850
								Os12g0405200
								Os01g0266200
								Os02g0564200
								Os07g0191650
								Os08g0272800
								Os03g0363100
								Os01g0101600
								Os02g0571100
								Os02g0138200
								Os03g0192700
								Os05g0267100
								Os03g0586300
								Os06g0137500
								Os02g0478500
								Os12g0210400
								Os11g0156050
								Os01g0194200
								Os08g0183900
								Os08g0189700
								Os06g0107650
								Os03g0345700
								Os01g0168600
								Os04g0165600
								Os03g0625800
								Os03g0225500
								Os03g0174300
								Os10g0158000
								Os03g0426350
								Os03g0241900
								Os02g0461900
								Os08g0295300
								Os02g0196800
								Os12g0125800
								Os01g0571133
								Os12g0240900
								Os11g0133700
								Os04g0323500
								Os03g0292200
								Os12g0297500
								Os05g0349000
								Os12g0170300
								Os01g0192550
								Os09g0359800
								Os02g0470400
								Os01g0520600
								Os02g0219800
								Os09g0293900
								Os10g0188900
								Os05g0243300
								Os03g0622300
								Os03g0201500
								Os11g0119100
								Os05g0153000
								Os03g0170500
								Os03g0123800
								Os03g0591700
								Os02g0467400
								Os06g0246200
								Os03g0597600
								Os07g0252000
								Os12g0198700
								Os04g0320200
								Os05g0149400
								Os08g0205800
								Os04g0370900
								Os07g0214300
								Os02g0262800
								Os05g0291700
								Os02g0495400
								Os11g0256050
								Os01g0302000
								Os07g0160000
								Os02g0209300
								Os06g0206900
								Os07g0202000
								Os02g0140200
								Os06g0225900
								Os02g0122000
								Os11g0128000
								Os02g0477100
								Os06g0283400
								Os01g0658400
								Os10g0132500
								Os06g0488600
								Os08g0192200
								Os03g0144800
								Os03g0266000
								Os10g0100700
								Os04g0297800
								Os10g0360600
								Os03g0214100
								Os01g0615100
								Os07g0159550
								Os11g0183900
								Os06g0207950
								Os01g0293000
								Os02g0533700
								Os03g0297700
								Os02g0572400
								Os05g0136400
								Os03g0288900
								Os04g0118900
								Os02g0286891
								Os01g0602500
								Os01g0356500
								Os02g0192700
								Os03g0196800
								Os02g0539500
								Os01g0543100
								Os01g0668700
								Os09g0313550
								Os03g0606600
								Os03g0413100
								Os07g0212400
								Os03g0347200
								Os01g0227300
								Os08g0205400
								Os07g0277600
								Os02g0568700
								Os04g0284600
								Os05g0349500
								Os06g0307900
								Os01g0326300
								Os02g0504900
								Os03g0349000
								Os02g0533300
								Os11g0129700
								Os07g0439000
								Os03g0171600
								Os04g0307200
								Os01g0574600
								Os04g0244400
								Os09g0240500
								Os02g0156700
								Os05g0218400
								Os06g0119900
								Os06g0219800
								Os02g0216300
								Os07g0290800
								Os02g0513000
								Os08g0119700
								Os06g0102200
								Os02g0126600
								Os03g0324300
								Os01g0624700
								Os03g0362500
								Os06g0192800
								Os12g0259800
								Os12g0118400
								Os04g0243400
								Os06g0103400
								Os08g0191650
								Os02g0314600
								Os01g0200300
								Os09g0371000
								Os07g0157401
								Os01g0128100
								Os01g0613900
								Os04g0179200
								Os11g0129301
								Os11g0121400
								Os04g0223500
								Os03g0170200
								Os04g0184100
								Os03g0119700
								Os01g0631700
								Os01g0115700
								Os03g0245100
								Os02g0462500
								Os07g0174766
								Os02g0125200
								Os06g0105350
								Os03g0203800
								Os05g0110900
								Os03g0269700
								Os01g0621400
								Os05g0105600
								Os01g0113700
								Os03g0274300
								Os05g0246600
								Os01g0658900
								Os01g0508500
								Os12g0225900
								Os11g0147500
								Os07g0432201
								Os03g0225900
								Os03g0356300
								Os03g0156700
								Os03g0599000
								Os01g0540800
								Os05g0125600
								Os01g0602466
								Os12g0100500
								Os06g0319133
								Os02g0507400
								Os03g0132300
								Os03g0217000
								Os05g0142100
								Os03g0406900
								Os12g0245000
								Os03g0184600
								Os11g0120600
								Os02g0275200
								Os03g0197100
								Os04g0379600
								Os03g0186950
								Os05g0336000
								Os03g0136900
								Os02g0119200
								Os05g0134400
								Os09g0306232
								Os12g0286600
								Os03g0238300
								Os07g0147900
								Os03g0583000
								Os02g0170100
								Os10g0132300
								Os06g0227250
								Os07g0157900
								Os04g0340550
								Os07g0242400
								Os05g0333200
								Os02g0251700
								Os05g0103000
								Os03g0236200
								Os06g0134000
								Os01g0169900
								Os02g0114300
								Os01g0184500
								Os03g0183050
								Os05g0140100
								Os08g0110400
								Os03g0576700
								Os03g0372700
								Os05g0198200
								Os08g0274700
								Os03g0611700
								Os12g0226400
								Os07g0110000
								Os10g0154600
								Os01g0296200
								Os03g0326000
								Os12g0145400
								Os03g0142800
								Os09g0120800
								Os04g0151700
								Os01g0143100
								Os08g0157500
								Os11g0170000
								Os03g0308100
								Os01g0164400
								Os02g0184100
								Os11g0109700
								Os07g0429700
								Os12g0140266
								Os12g0239200
								Os04g0322100
								Os11g0180800
								Os07g0163000
								Os01g0278950
								Os12g0112800
								Os01g0392100
								Os03g0265001
								Os03g0235000
								Os03g0168500
								Os03g0124500
								Os05g0232500
								Os12g0152750
								Os01g0622800
								Os11g0147100
								Os05g0299700
								Os07g0194000
								Os08g0234000
								Os07g0162300
								Os01g0351300
								Os05g0243200
								Os11g0129500
								Os07g0463500
								Os07g0242050
								Os03g0150700
								Os08g0298700
								Os03g0570800
								Os01g0197500
								Os05g0160300
								Os03g0109700
								Os03g0576900
								Os02g0202900
								Os04g0302900
								Os03g0192400
								Os07g0446900
								Os03g0262300
								Os02g0533200
								Os07g0434700
								Os07g0100200
								Os06g0114600
								Os07g0106100
								Os05g0242600
								Os02g0529900
								Os03g0145800
								Os07g0244400
								Os03g0153100
								Os07g0262200
								Os01g0614500
								Os06g0129700
								Os11g0233201
								Os06g0184900
								Os01g0232300
								Os06g0117500
								Os02g0114700
								Os11g0210201
								Os08g0123833
								Os03g0287400
								Os11g0204100
								Os11g0264700
								Os03g0158600
								Os07g0416700
								Os02g0570600
								Os02g0454500
								Os04g0373400
								Os03g0237500
								Os10g0336300
								Os01g0608101
								Os06g0300700
								Os01g0664000
								Os02g0525400
								Os04g0249500
								Os03g0189400
								Os01g0114650
								Os06g0244700
								Os02g0130200
								Os02g0571800
								Os01g0225000
								Os01g0192600
								Os02g0253150
								Os08g0126700
								Os09g0293500
								Os03g0581400
								Os01g0603300
								Os12g0191300
								Os04g0326300
								Os05g0334400
								Os02g0583700
								Os11g0189600
								Os06g0122800
								Os06g0183100
								Os08g0203400
								Os11g0136450
								Os10g0340301
								Os12g0291733
								Os03g0617500
								Os07g0205700
								Os04g0375900
								Os03g0198900
								Os12g0123700
								Os08g0124000
								Os05g0169800
								Os06g0159400
								Os01g0531400
								Os06g0147300
								Os08g0202200
								Os03g0118600
								Os06g0140400
								Os06g0483900
								Os02g0302700
								Os07g0107000
								Os01g0142100
								Os12g0132900
								Os04g0179700
								Os03g0170900
								Os01g0166700
								Os02g0236600
								Os08g0326400
								Os01g0383900
								Os06g0215600
								Os07g0147700
								Os02g0191500
								Os12g0198200
								Os12g0178700
								Os12g0153200
								Os04g0317300
								Os09g0334500
								Os12g0237900
								Os01g0644500
								Os01g0159250
								Os01g0600500
								Os12g0147500
								Os12g0131100
								Os12g0199100
								Os08g0166400
								Os12g0125550
								Os07g0262800
								Os08g0174500
								Os06g0135900
								Os11g0103700
								Os01g0532700
								Os05g0147133
								Os07g0153400
								Os12g0265100
								Os12g0181533
								Os03g0402400
								Os07g0107100
								Os06g0250600
								Os01g0248701
								Os11g0123400
								Os06g0212900
								Os03g0146100
								Os03g0574600
								Os03g0386600
								Os08g0124533
								Os04g0180900
								Os05g0137100
								Os11g0171350
								Os06g0255900
								Os06g0156501
								Os01g0528800
								Os08g0103400
								Os04g0291900
								Os12g0139600
								Os01g0281600
								Os01g0377700
								Os12g0111800
								Os07g0172600
								Os12g0207600
								Os09g0364400
								Os01g0186400
								Os08g0236700
								Os08g0143300
								Os12g0135051
								Os08g0103000
								Os09g0284250
								Os07g0102200
								Os11g0307950
								Os01g0106300
								Os06g0179200
								Os03g0305050
								Os03g0396900
								Os12g0168400
								Os01g0115100
								Os01g0304050
								Os02g0301800
								Os07g0252200
								Os08g0240000
								Os08g0300200
								Os05g0227901
								Os06g0147000
								Os04g0101700
								Os02g0467200
								Os01g0382400
								Os01g0389700
								Os06g0118700
								Os01g0622600
								Os07g0166800
								Os10g0357700
								Os11g0138600
								Os08g0136500
								Os01g0651400
								Os01g0330100
								Os07g0109400
								Os03g0418700
								Os03g0587000
								Os08g0269800
								Os02g0157300
								Os06g0253350
								Os07g0134101
								Os07g0218700
								Os07g0454200
								Os05g0217000
								Os01g0541600
								Os02g0189100
								Os12g0143200
								Os02g0287000
								Os03g0397500
								Os07g0107366
								Os03g0101900
								Os03g0427300
								Os01g0617600
								Os07g0129300
								Os06g0294200
								Os03g0367150
								Os06g0255300
								Os04g0117600
								Os02g0222500
								Os11g0151500
								Os08g0107500
								Os03g0199000
								Os12g0208950
								Os01g0564400
								Os05g0209500
								Os02g0105300
								Os01g0348700
								Os08g0300100
								Os01g0366300
								Os02g0168400
								Os01g0253400
								Os03g0100200
								Os03g0298800
								Os03g0355400
								Os01g0651300
								Os11g0106900
