# Supplementary material for: OsCAMTA3 Negatively Regulates Disease Resistance to Magnaporthe oryzae by Associating with OsCAMTAPL in Rice
Source: Int J Mol Sci. 2024 May 6;25(9):5049. doi: 10.3390/ijms25095049 (PMC11084498; doi:10.3390/ijms25095049)
Supplement: Supplementary file 1 [file ijms-25-05049-s001.zip › Table S4. Primers used in this study.xlsx]

## Sheet: Sheet1
		Table S4. Primers used in this study.
		Sequence of primers usedfor genotyping				Primers used for plasmid construction
		Name	Sequences (5′–3′)			Name	Sequences (5′–3′)
		oscamta1_F	ACAAAGAGTACTGGACTGCC	For oscamta1/2		OsCAMTAPL_nLUC_F	ACGGGGGACGAGCTCGGTACCATGTTTGGGGATGTTGAAG
		oscamta1_R	ATTTCCTGGCCCCTTGTGTT			OsCAMTAPL_nLUC_R	CGCGTACGAGATCTGGTCGACCCAAATGGCAGACATTTGG
		oscamta2_ F	CTAGGTGGCTCGCTTTTCCT			OsCAMTA3TIG_ANK cLUC_F	ACGCGTCCCGGGGCGGTACCAGCATTATTGATGTTTCTCC
		oscamta2_R	TCCCTGCAAAAGCAAGGGTA			OsCAMTA3TIG_ANK cLUC_R	ACGAAAGCTCTGCAGGTCGACCTAAGACTCTGCAAGGAAA
		oscamta3-1/2_F	ACAGTTGATTCGGGAGCGGT	For oscamta3		BD_OsCAMTAPL_F	TCAGAGGAGGACCTGCATATGATGTTTGGGGATGTT
		oscamta3-1/2_R	TCCCAGGAAACAAATGGAGGT			BD_OsCAMTAPL_R	TCGACGGATCCCCGGGAATTCTCACCAAATGGCAGA
		oscamtapl-1/2_F	CGCAGGTTCTGGTAACTGGT	For oscamtapl		AD_OsCAMTA3CG_1 R_F	GTACCAGATTACGCTCATATGATGGCGGAGGTTCGCAAGTA
		oscamtapl-1/2_R	GGTTCCTTGGGGTGACAACA			AD_OsCAMTA3 CG_1_R	ATGCCCACCCGGGTGGAATTCACAAGCCACCCTATTGGAG
		oscamta3_F	TGCAAATCACGACGTGTCAA	For oscamta3/pl		AD_OsCAMTA3TIG_ANK _F	GTACCAGATTACGCTCATATGCGAGCAAGCTCCAGATACC
		oscamta3_R	TGCCACATGGGATTCCTGAT			AD-OsCAMTA3TIG_ANK _R	ATGCCCACCCGGGTGGAATTCAGACTCTGCAAGGAAACC
		oscamtapl_F	CGCAGGTTCTGGTAACTGGT			AD_OsCAMTA3IQs_F	GTACCAGATTACGCTCATATGGCTTTGACAAGTCATCTTTC
		oscamtapl_R	GGTTCCTTGGGGTGACAACA			AD_OsCAMTA3IQs_R	ATGCCCACCCGGGTGGAATTCTCACAAAATGGTGGGCAT
						Myc_OsCAMTA3TIG_ANK _F	CTGCAGGGGCCCGGGGTCGACATGAGCATTATTGATGTTT
						Myc_OsCAMTA3TIG_ANK _R	AGCTTTTGCTCCATGGTACCAGACTCTGCAAGGAAACCA
						Flag_OsCAMTAPL_F	GGGGACAAGTTTGTACAAAAAAGCAGGCTTCATGATGTTTGGGGATGTT
						Flag_OsCAMTAPL_R	GGGGACCACTTTGTACAAGAAAGCTGGGTCTCACCAAATGGCAGA
		Sequence of primers used for qRT-PCR analysis in this study.
		Name	Sequences (5′–3′)			Sequence of primers used for EMSA analysis in this study
		Ubq_F	AACCAGCTGAGGCCCAAGA
		Ubq_R	ACGATTGATTTAACCAGTCC			Name	Sequences (5′–3′)
		OsOPR1_RT_F	CGGGAGGAAGGGAACAAGG			CY5_EMASA_ALDH2B1_F	TCCACTGGGGACGTACGAGCTCCGCGCATCCCTTCCATTCCATTACTGAC
		OsOPR1_RT_R	AATGGTGCGTCAAGCTCAAA			EMASA_ALDH2B1_R	GTCAGTAATGGAATGGAAGGGATGCGCGGAGCTCGTACGTCCCCAGTGGA
		OsPR5_RT_F	CAACAGCAACTACCAAGTCGTCTT			Competitor_F	TCCACTGGGGACGTACGAGCTCCGCGCATCCCTTCCATTCCATTACTGAC
		OsPR5_RT_R	CAAGGTGTCGTTTTATTCATCAACTT			Competitor_R	GTCAGTAATGGAATGGAAGGGATGCGCGGAGCTCGTACGTCCCCAGTGGA
		OsPR10_RT_F	CCCTGCCGAATACGCCTAA			Mutant Competitor_F	TCCACTGGGGACGTACGAGCTCAAAACATCCCTTCCATTCCATTACTGAC
		OsPR10_RT_R	CTCAAACGCCACGAGAATTT			Muatnt Competitor_R	GTCAGTAATGGAATGGAAGGGATGTTTTGAGCTCGTACGTCCCCAGTGGA
		OsPR8_RT_F	GTTCATCTGGTCAGCGGATA
		OsPR8_RT_R	TCATAAGTATTATCACGACCG
		OsWRKY45_RT_F	TCGTCCGGGAATTCGGTGGT
		OsWRKY45_RT_R	AGGCCTTTGGGTGCTTGGAG
		OsUG_F	TTCTGGTCCTTCCACTTTCAG
		OsUG_R	ACGATTGATTTAACCAGTCCATGA
		MoPot2_F	ACGACCCGTCTTTACTTATTTGG
		MoPot2_R	AAGTAGCGTTGGTTTTGTTGGAT
		RT-CAMTA3f	TGGCTCGCTTTTTCTGTTCG
		RT-CAMTA3r	TAGGTACGTCTCTGGAAGTT
		RT-CAMTAPLf	ATTGGGCTGCGTCTTGTGGA
		RT-CAMTAPLr	TAGAGGCTAAATCGGCTGGA
		RT_OsALDH2B1_qF	TGTGCTGGGTCTCGTACATTTG
		RT_OsALDH2B1_qR	TCTTGTTGAATTGCTCGTCATCA
		RT_OsBIERF4_F	TTGTCCTTCTAGGCTCTAGC
		RT_OsBIERF4_R	TCATTACCGAAAGGAACCAG
		RT_OsHAC1_F	CTGCTATGTTCGTGATCTGC
		RT_OsHAC1_R	TGTCCTGACGTCCAAGTAGC
		RT_OsSAMS1_F	GCACTTGATACCTTCCTCTT
		RT_OsSAMS1_R	TGCAGGTCTCACAAGCGACC
		RT_OsBZR1-F1	GCGTCGGCGCGAAAT
		RT_OsBZR1-R1	GTCCACGAAAGGAACCATC
